# Supplementary material for: Role of miRNAs shuttled by mesenchymal stem cell-derived small extracellular vesicles in modulating neuroinflammation
Source: PubMed Central journal article supplement (PMC7814007; doi:10.1038/s41598-021-81039-4), 2021-01-18
Supplement: 41598_2021_81039_MOESM1_ESM.pdf [file 41598_2021_81039_MOESM1_ESM.pdf]

# In-Depth Data Analysis Report

## miRNA Microarray Service

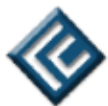

Prepared by

**LC Sciences, LLC** | [www.LCsciences.com](http://www.LCsciences.com) | [support@LCsciences.com](mailto:support@LCsciences.com)

2575 W. Bellfort, Suite 270, Houston, Texas 77054

Tel. 713 664-7087, Fax 713 664-8181

## Statistic Test and Clustering Analysis

The miRNA expression was tested in 3 different batches of MSC activated or not with IFN- $\gamma$ . Each experiment was performed in triplicate.

The following analysis refers to the mean miRNA expression of group 1 (from all 3 batches of MSC+ IFN- $\gamma$ ) compared to that of group 2 (from all 3 batches of MSC).

Significance was determined using T- test between data from GROUP 1 and GROUP 2.

| GROUP 1                     | GROUP 2      |
|-----------------------------|--------------|
| MSCs batch 1 +IFN- $\gamma$ | MSCs batch 1 |
| MSCs batch 2 +IFN- $\gamma$ | MSCs batch 2 |
| MSCs batch 3 +IFN- $\gamma$ | MSCs batch 3 |

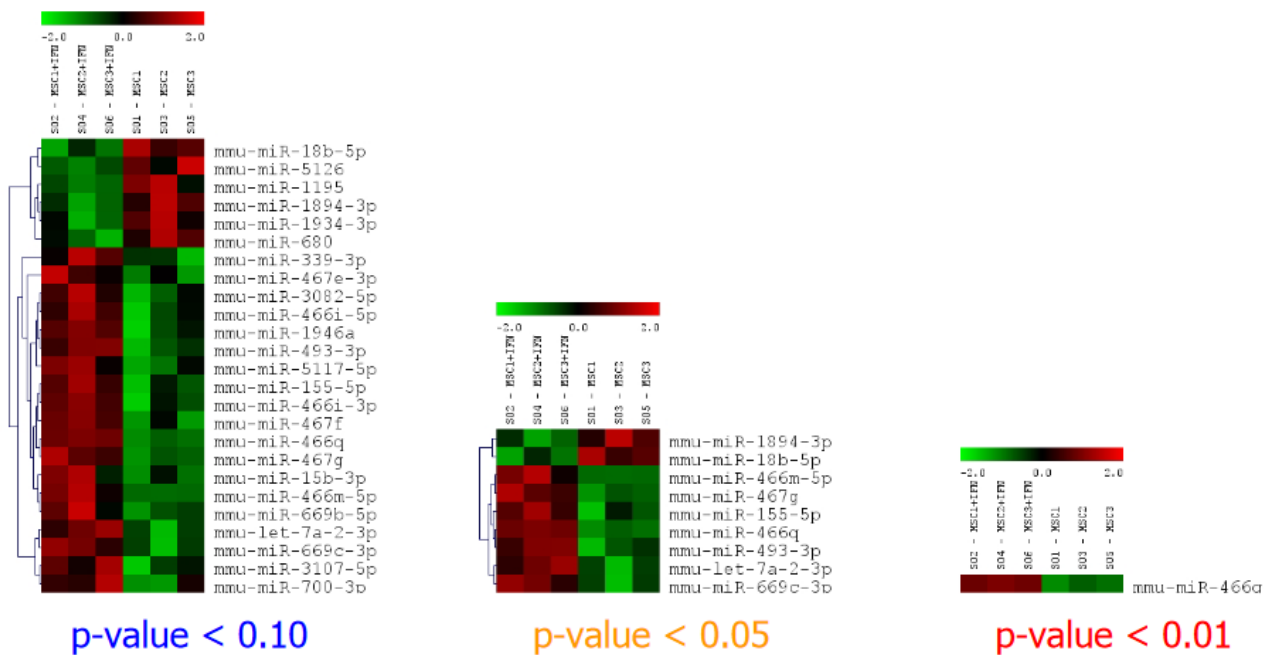

|                                                                                         |                 |          | Group 1      | Group 2 |                 |
|-----------------------------------------------------------------------------------------|-----------------|----------|--------------|---------|-----------------|
|                                                                                         |                 |          | MSC +<br>INF | MSC     |                 |
| Rpter<br>Index                                                                          | Reporter Name   | p-value  | Mean         | Mean    | Log2<br>(G2/G1) |
| 797                                                                                     | mmu-miR-466q    | 3.73E-03 | 2,780        | 2,041   | -0.45           |
| 809                                                                                     | mmu-miR-467g    | 1.19E-02 | 1,514        | 1,132   | -0.42           |
| 984                                                                                     | mmu-miR-669c-3p | 2.91E-02 | 2,631        | 2,046   | -0.36           |
| 792                                                                                     | mmu-miR-466m-5p | 4.83E-02 | 1,276        | 1,078   | -0.24           |
| 808                                                                                     | mmu-miR-467f    | 5.61E-02 | 3,447        | 2,687   | -0.36           |
| 882                                                                                     | mmu-miR-5117-5p | 5.79E-02 | 11,484       | 8,481   | -0.44           |
| 505                                                                                     | mmu-miR-3082-5p | 6.86E-02 | 2,058        | 1,637   | -0.33           |
| 786                                                                                     | mmu-miR-466i-5p | 6.90E-02 | 4,539        | 3,556   | -0.35           |
| 570                                                                                     | mmu-miR-3107-5p | 7.27E-02 | 531          | 84      | -2.65           |
| 785                                                                                     | mmu-miR-466i-3p | 7.56E-02 | 3,389        | 2,681   | -0.34           |
| 51                                                                                      | mmu-miR-1195    | 8.44E-02 | 878          | 1,627   | 0.89            |
| 806                                                                                     | mmu-miR-467e-3p | 8.75E-02 | 1,454        | 1,191   | -0.29           |
| 891                                                                                     | mmu-miR-5126    | 9.02E-02 | 3,321        | 4,638   | 0.48            |
| Following transcripts are statistically significant but have low signals (signal < 500) |                 |          |              |         |                 |
| 833                                                                                     | mmu-miR-493-3p  | 2.03E-02 | 82           | 42      | -0.96           |
| 209                                                                                     | mmu-miR-18b-5p  | 2.36E-02 | 59           | 103     | 0.80            |
| 2                                                                                       | mmu-let-7a-2-3p | 2.80E-02 | 42           | 26      | -0.68           |
| 198                                                                                     | mmu-miR-1894-3p | 3.76E-02 | 142          | 249     | 0.81            |
| 156                                                                                     | mmu-miR-155-5p  | 3.94E-02 | 196          | 54      | -1.85           |
| 1025                                                                                    | mmu-miR-680     | 5.87E-02 | 23           | 47      | 1.05            |
| 239                                                                                     | mmu-miR-1934-3p | 6.97E-02 | 51           | 104     | 1.04            |
| 614                                                                                     | mmu-miR-339-3p  | 7.05E-02 | 39           | 20      | -0.94           |
| 257                                                                                     | mmu-miR-1946a   | 7.29E-02 | 322          | 183     | -0.81           |
| 159                                                                                     | mmu-miR-15b-3p  | 8.83E-02 | 116          | 76      | -0.60           |
| 1043                                                                                    | mmu-miR-700-3p  | 8.92E-02 | 314          | 230     | -0.45           |
| 983                                                                                     | mmu-miR-669b-5p | 9.86E-02 | 368          | 329     | -0.16           |
