# Supplementary material for: Role of miRNAs shuttled by mesenchymal stem cell-derived small extracellular vesicles in modulating neuroinflammation
Source: PubMed Central journal article supplement (PMC7814007; doi:10.1038/s41598-021-81039-4), 2021-01-18
Supplement: 41598_2021_81039_MOESM4_ESM.pdf [file 41598_2021_81039_MOESM4_ESM.pdf]

## **Supplementary Information**

### **Role of miRNAs shuttled by mesenchymal stem cell-derived small extracellular vesicles in modulating neuroinflammation**

Debora Giunti, Chiara Marini, Benedetta Parodi, Cesare Usai, Marco Milanese, Giambattista Bonanno, Nicole Kerlero de Rosbo, Antonio Uccelli

#### **Supplementary Data S1 online (.pdf)**

##### **In-depth data analysis of miRNA expressed in IFN- $\gamma$ -primed and unprimed MSCs identified by microarray analysis**

Microarray analysis showed that miR-466q, miR-467g, miR-669c-3p, miR-466m-5p, miR-467f, miR-3082-5p, miR-466i-5p, miR-466i-3p and miR-5126 are significantly dysregulated in IFN- $\gamma$ -primed MSCs compared to unprimed MSCs.

#### **Supplementary data S2 online (.xls)**

List of the 1718 target genes predicted for miR-467f through miRWalk database

#### **Supplementary data S3 online (.xls)**

List of the 1157 target genes predicted for miR-466q through miRWalk database

## Supplementary Figure S1 online

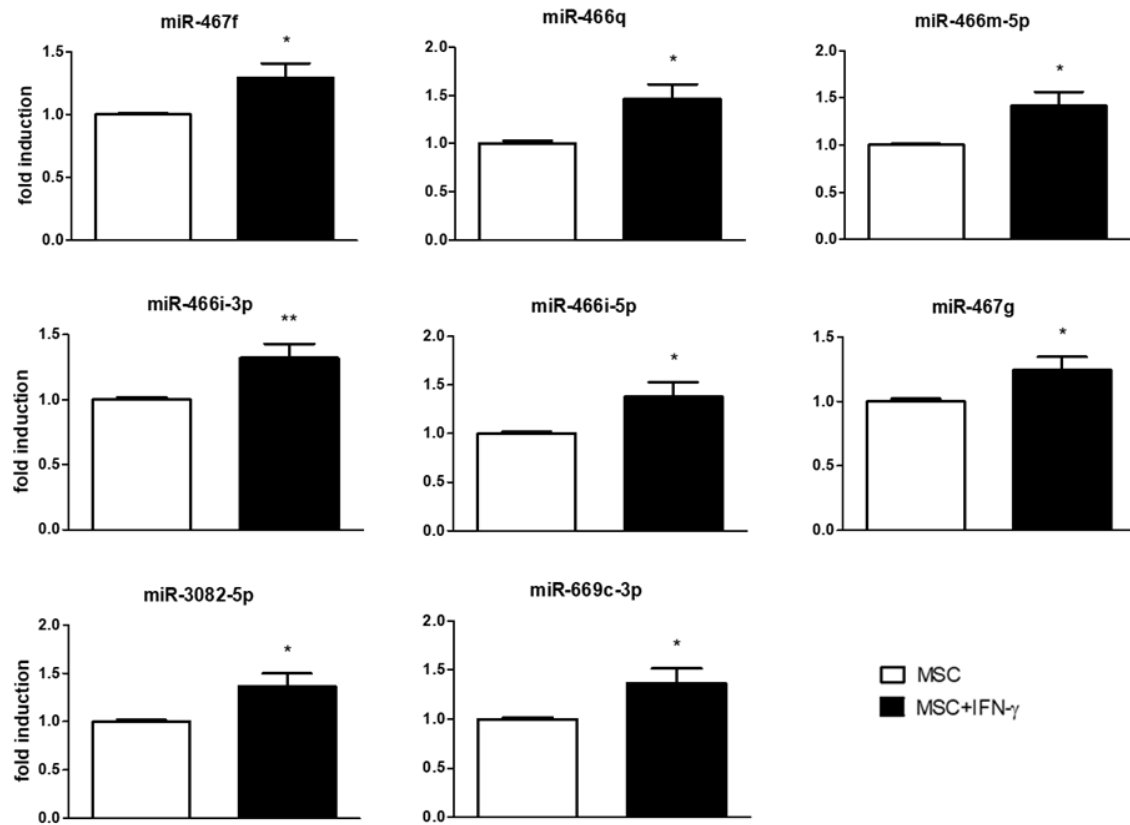

### Supplementary Figure S1 online

#### Validation of the significantly dysregulated miRNAs in immunomodulatory MSCs by RT-PCR

RT-PCR analysis on MSCs primed or not with IFN- $\gamma$  confirmed the significant dysregulation of the nine specific miRNAs upon IFN- $\gamma$  stimulation of MSCs. \* $P < 0.05$ , \*\* $P < 0.01$ . Data are presented as mean  $\pm$  SEM of 3 independent experiments.

## Supplementary Figure S2 online

**a**

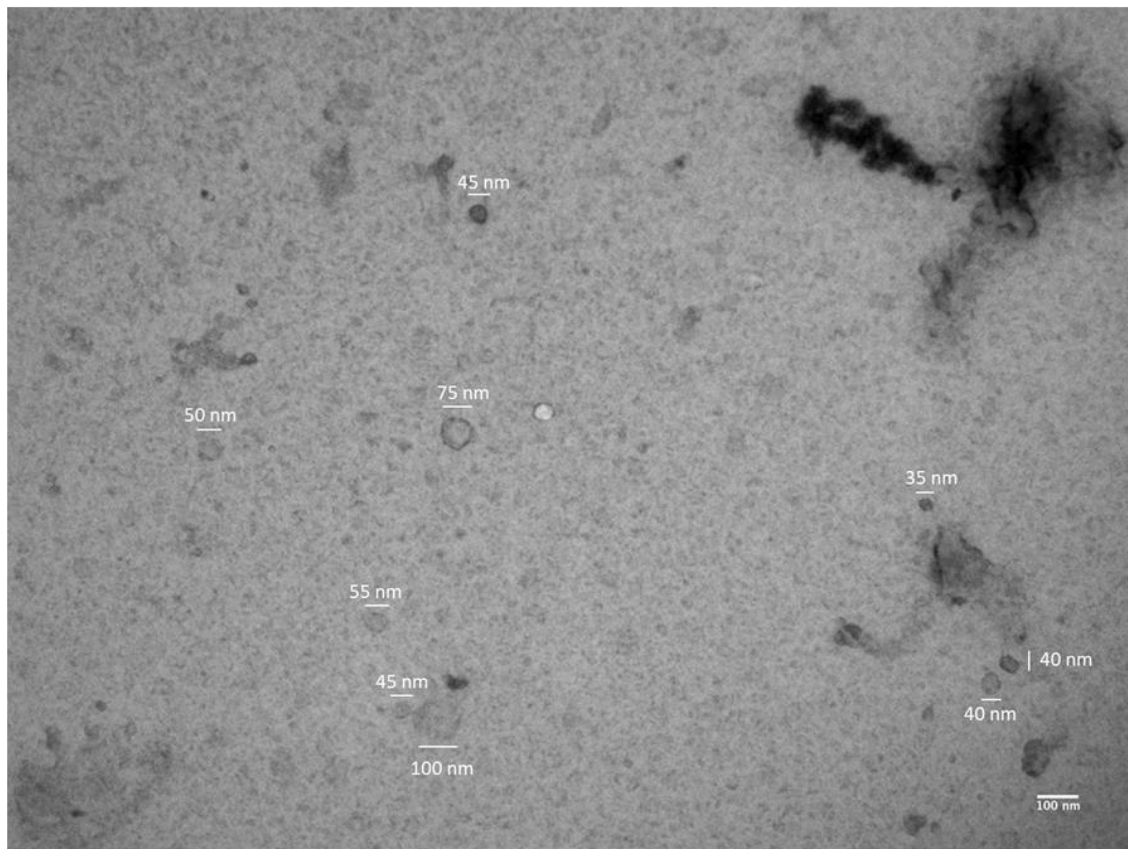

**b**

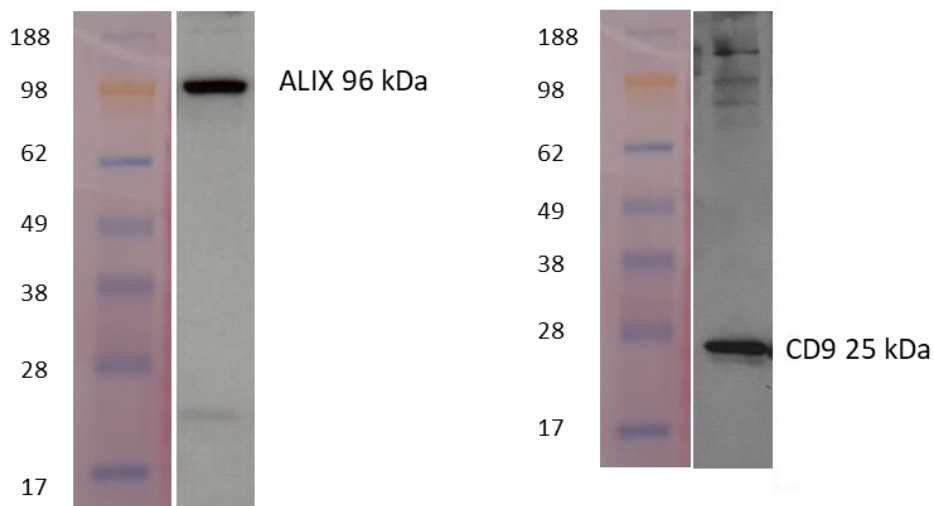

### Supplementary Figure S2 online

#### Characterization of s-EV isolated from IFN- $\gamma$ -primed MSCs through electron microscopy and Western blot

The presence of purified s-EV in the supernatant of IFN- $\gamma$ -primed MSCs was confirmed by electron microscopy which identified the presence of nanovesicles with a diameter range of 50-100 nm (representative image in panel **a**) and by western blot analysis showing the expression of the s-EV markers Alix and CD9 (one representative blot is shown in panel **b**)

## Supplementary Figure S3 online

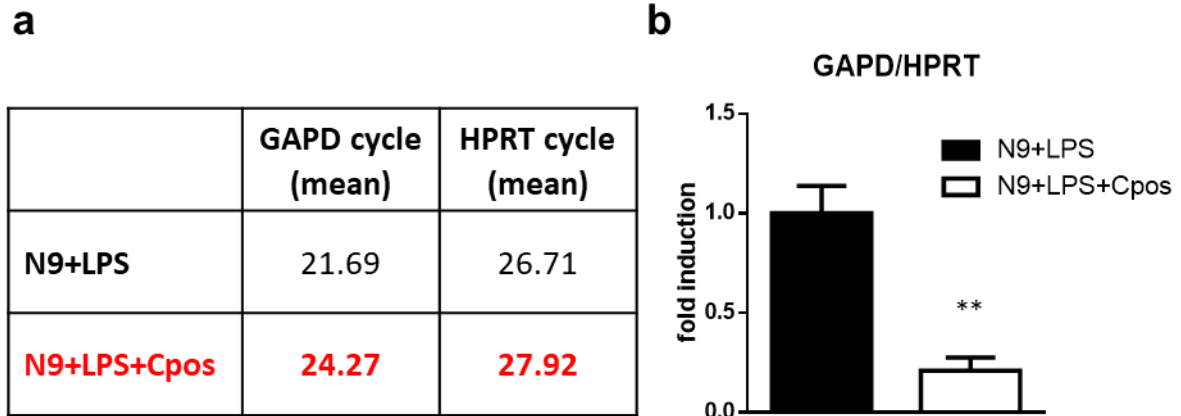

### Supplementary Figure S3 online

#### Positive control miRNA, which significantly decreases the mRNA expression of GAPDH, validates efficient transfection

Validation of transfection efficiency was assessed by RT-PCR analysis using a positive control (Cpos), which targets GAPDH expression. **a** cycle threshold and **b** relative quantification over HPRT, as reference gene. \*\* $P < 0.01$ . Data are presented as mean  $\pm$  SEM of 3 independent experiments

## Supplementary Figure S4 online

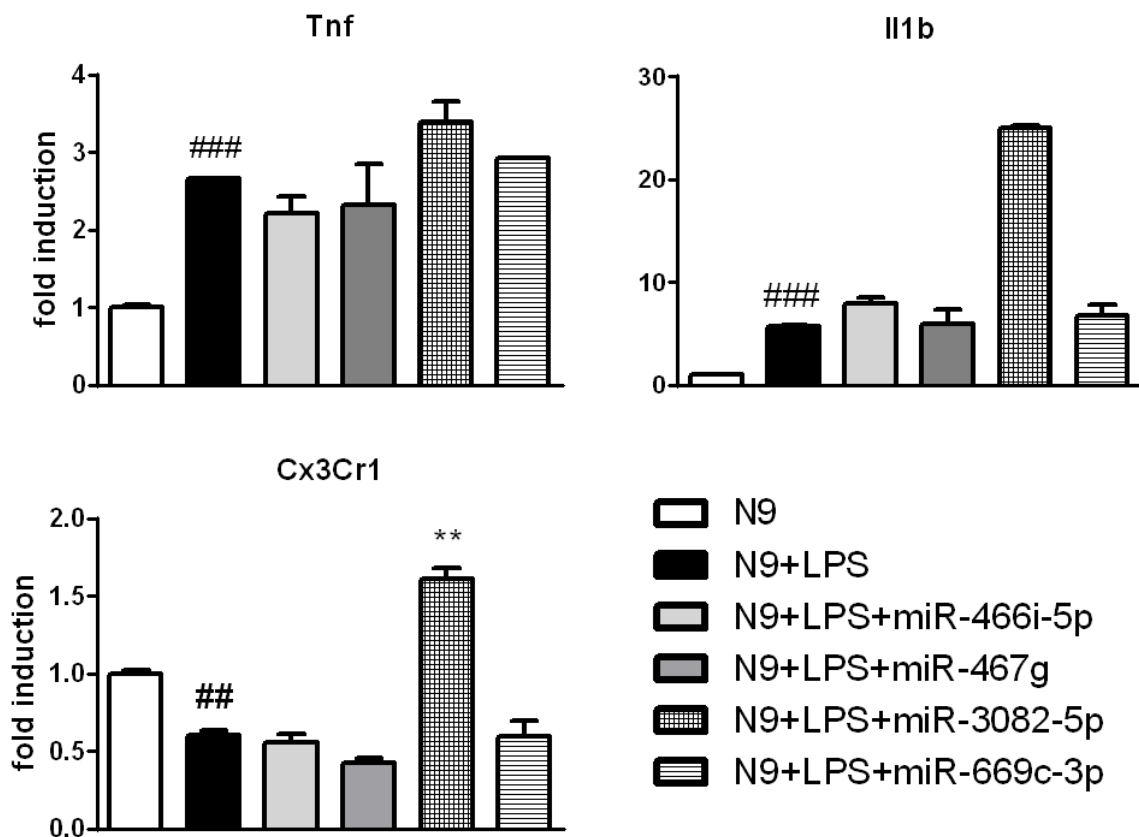

### Supplementary Figure S4 online

#### Expression of Tnf, Il1b and Cx3cr1 by LPS-activated N9 cells transfected with miRNAs that are dysregulated in IFN- $\gamma$ -primed MSCs but not in their derived s-EV

RT-PCR analysis shows that miR-466i-5p, miR-467g, miR-3082-5p, and miR-669c-3p did not affect the expression of Tnf and Il1b in LPS-activated microglia, and that miR-3082-5p induced a significant increase in Cx3cr1 expression in activated N9 cells. ## $P < 0.01$ , untreated (N9) vs LPS-activated N9 cells (N9+LPS); ### $P < 0.001$ , N9 vs N9+LPS; \*\* $P < 0.01$  N9+LPS vs N9+LPS transfected with specific miRNA (N9+LPS+miRNA). Data are presented as mean  $\pm$  SEM of 3 independent experiments.

## Supplementary Figure S5 online

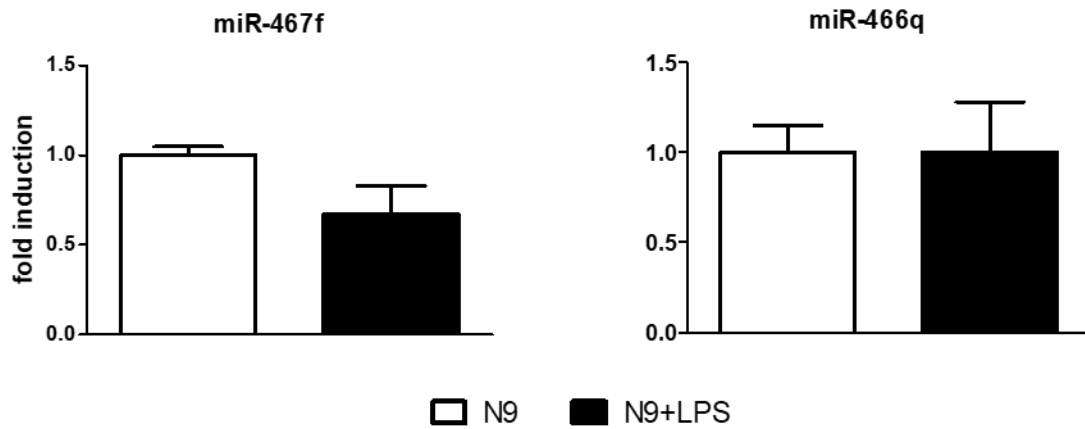

### Supplementary Figure S5 online

#### Expression of miR-467f and miR-466q in microglia cell line activated or not with LPS

RT-PCR results demonstrated that N9 microglia line cells express both miR-467f and miR-466q at basal level, and that miRNA expression did not increase upon LPS-activation of the cells. Data are presented as mean  $\pm$  SEM of 3 independent experiments

## Supplementary Figure S6 online

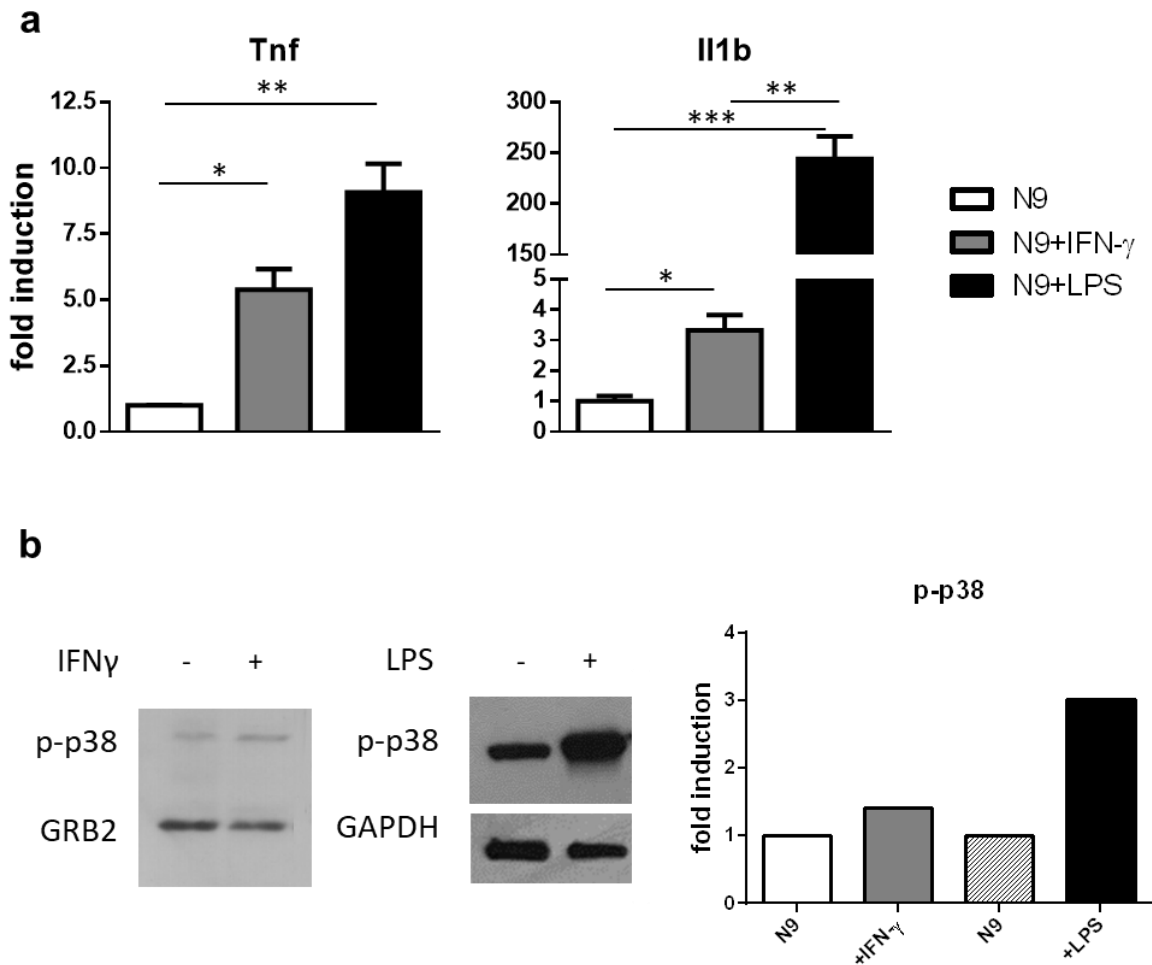

### Supplementary Figure S6 online

#### LPS is a stronger more consistent activator of N9 cells than IFN- $\gamma$

**a** Analysis of Tnf and Il1b mRNA expression by RT-PCR and **b** quantification of p-p38 by Western blotting performed in N9 cells stimulated or not with IFN- $\gamma$  (100 ng/ml) or LPS (1  $\mu$ g/ml) for 24h showed a stronger activation of N9 cell upon LPS activation in comparison to IFN- $\gamma$ . \* $P$  < 0.05, \*\* $P$  < 0.01, \*\*\*  $P$  < 0.001. Data are presented as mean  $\pm$  SEM of 3 independent experiments (a) and as fold induction of 1 experiment (b).

## Supplementary Figure S7 online

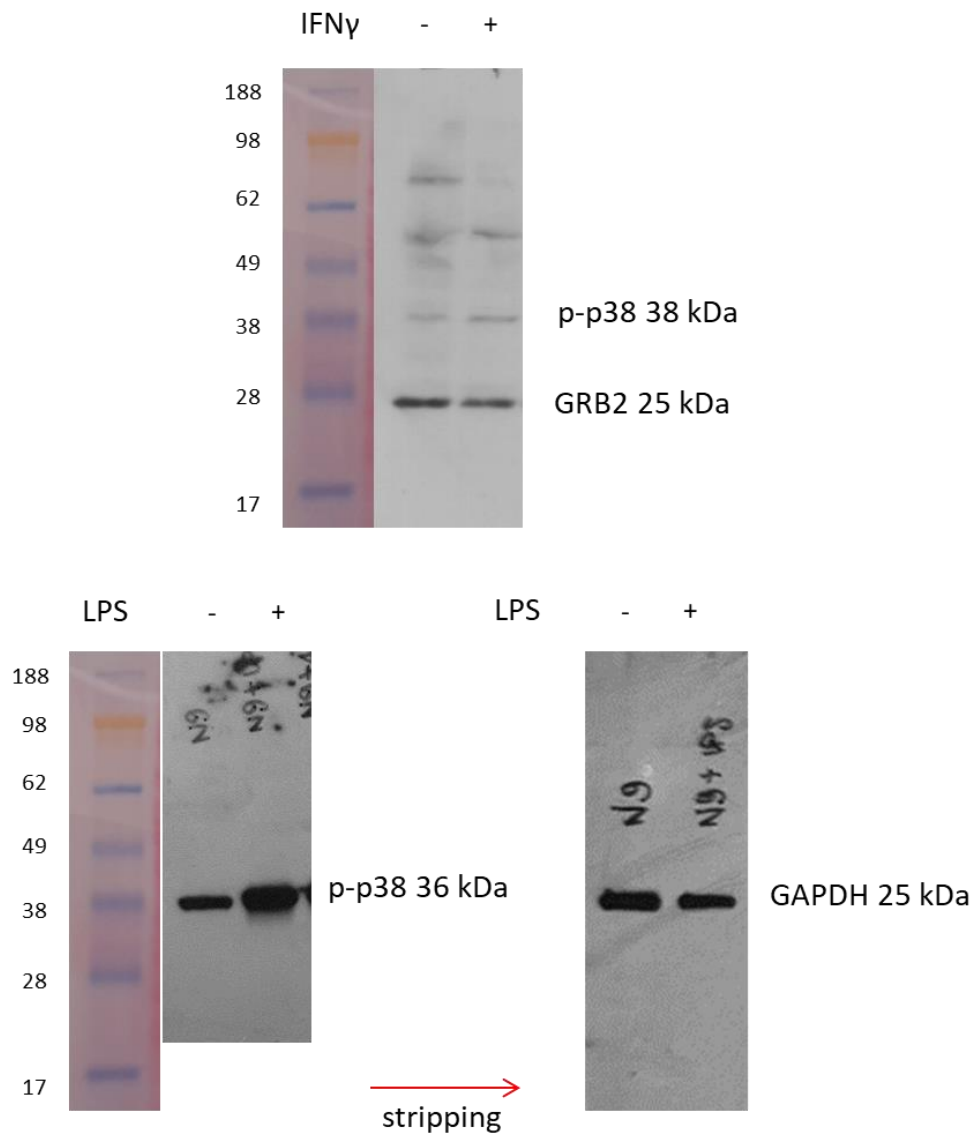

Supplementary Figure S7 online  
Unedited gels of Supplementary Figure S6 online
